# Supplementary material for: Fast-response oxygen sensitive transparent coating for inner pressure ratiometric optical mapping
Source: Royal Society of Chemistry journal article supplement (doi:10.1039/d0tc06123a), 2021-01-01
Supplement: d0tc06123a1.pdf [file d0tc06123a1.pdf]

*Electronic Supplementary Information*

**Fast-response oxygen sensitive transparent coating for inner pressure ratiometric optical mapping**

*Di Yang<sup>1</sup>, Jiwei Li<sup>1,2</sup>, Junkai Ren<sup>3</sup>, Qinglin Wang<sup>1</sup>, Shuyun Zhou<sup>3</sup>, Qiu Wang<sup>2\*</sup>, Zheng Xie<sup>3\*</sup> and Xiaozhong Qu<sup>1\*</sup>*

<sup>1</sup> Center of Materials Science and Optoelectronics Engineering, College of Materials Science and Opto-Electronic Technology, University of Chinese Academy of Sciences, Beijing 100049, China.

<sup>2</sup> State Key Laboratory of High Temperature Gas Dynamics, Institute of Mechanics, Chinese Academy of Sciences, Beijing 100190, China

<sup>3</sup> Key Laboratory of Photochemical Conversion and Optoelectronic Materials, Technical Institute of Physics and Chemistry, Chinese Academy of Sciences, Beijing 100190, China

\* Email: wangqiu@imech.ac.cn (Q.W.), zhengxie@mail.ipc.ac.cn (Z.X.), quxz@iccas.ac.cn (X.Q.)

## Supplementary Experimental Detials

### Numerical simulation

Governing equations including compressible Navier-Stokes equations assuming laminar flow were employed,

$$\frac{\partial U}{\partial t} + \frac{\partial F}{\partial x} + \frac{\partial G}{\partial y} = \frac{\partial F_v}{\partial x} + \frac{\partial G_v}{\partial y}$$
$$U = \begin{bmatrix} \rho \\ \rho u \\ \rho v \\ E \end{bmatrix} \quad F = \begin{bmatrix} \rho u \\ \rho u^2 + p \\ \rho uv \\ u(E + p) \end{bmatrix} \quad G = \begin{bmatrix} \rho v \\ \rho uv \\ \rho v^2 + p \\ v(E + p) \end{bmatrix} \quad F_v = \begin{bmatrix} 0 \\ \tau_{xx} \\ \tau_{xy} \\ u\tau_{xx} + v\tau_{xy} + q_x \end{bmatrix} \quad G_v = \begin{bmatrix} 0 \\ \tau_{xy} \\ \tau_{yy} \\ u\tau_{xy} + v\tau_{yy} + q_y \end{bmatrix}$$

where  $U$  is the conservative variable vector,  $F$  and  $G$  are the inviscid flux vectors,  $F_v$  and  $G_v$  are the viscous flux vectors respectively, and  $\rho$ ,  $u$ , and  $E$  are density, velocity, and total energy per unit volume. The governing equations were solved using a finite difference approach. Convective terms were approximated using the Roe-FDS scheme and the central difference method was applied to the viscous terms. No-slip and isothermal boundary conditions were specified as the boundary conditions at the wall. And temperature was set to 300 K.

## Supplementary Scheme

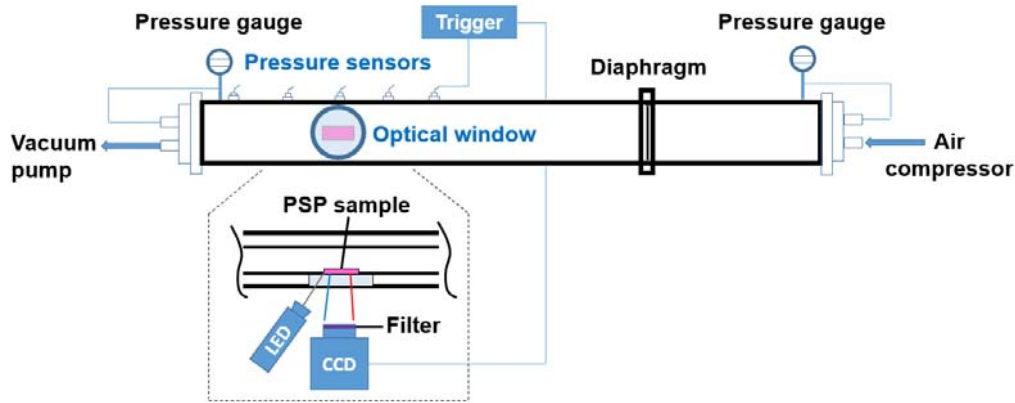

**Scheme S1.** The setup of shock tube for the testing the unsteady aerodynamic performance of the transparent PSP coating. The shock tube has a square section of  $84 \times 84$  mm, a long driver section of 0.5 m and a long low pressure section of 2.2 m. A quartz window with a diameter of 60 mm is placed on the vertical wall of the tube at 0.8 m from the low pressure section, on which a sample plate ( $50 \times 25 \times 1.2$  mm) was pasted with the coating surface towards the inner section, leaving an attack angle of  $0^\circ$ . Outside the quartz window, a LED array ( $\lambda_{\text{ex}} = 365$  nm) and a high-speed CCD camera (FASTCAM Mini AX 200, Japan) equipped with a 410 nm filter were placed. The camera was connected to a trigger (DG535, USA) and set at a recording speed of 10000 Hz (0.1 ms per picture) with a resolution of  $1024 \times 672$  pixels. The experiments were started at  $25^\circ\text{C}$ , when the low pressure section was filled with air at an initial pressure of 20 kPa.

## Supplementary Figures

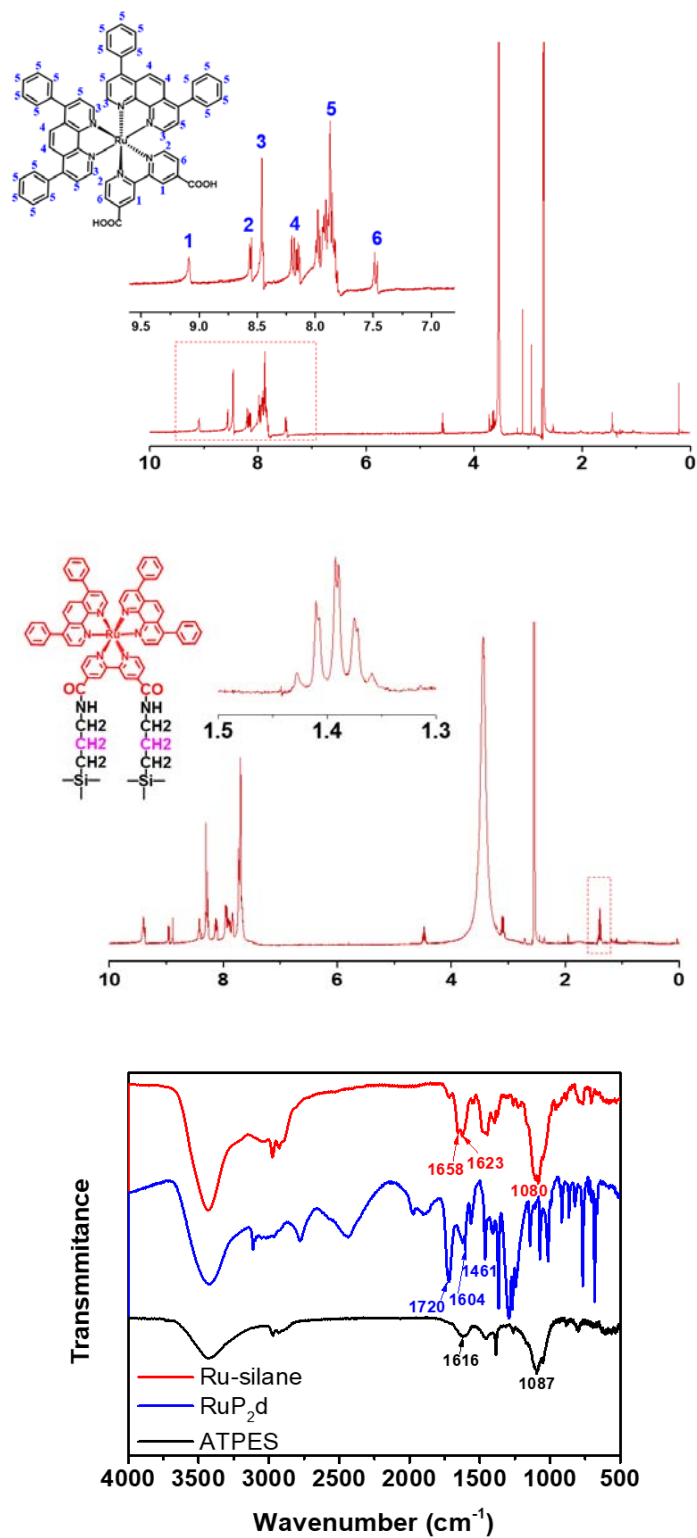

Figure S1. <sup>1</sup>H NMR and FTIR spectra of RuP<sub>2</sub>d and Ru-silane.

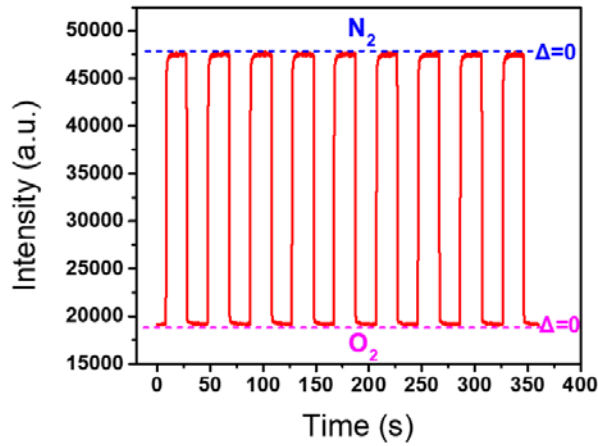

**Figure S2.** Photostability and sensitivity of the transparent bi-layer PSP coating upon the alternation of nitrogen and oxygen atmosphere in 6 min.

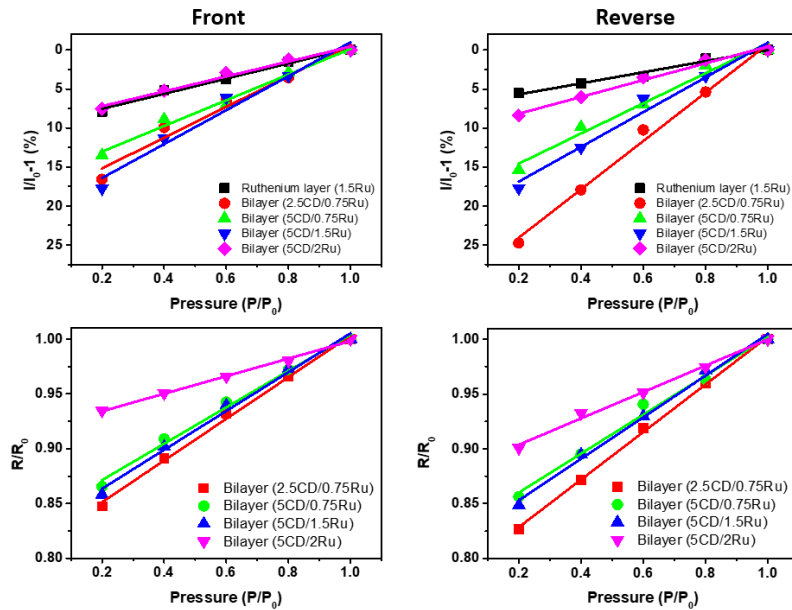

**Figure S3.** Influence of chemical composition in the PSP coatings on their sensitivity to the surface pressure.  $x\text{CDyRu}$  presents that the composition of SiCDs and Ru-silane was  $x$  mg/mL and  $y$  mg/mL in the reference paint and the sensitive paint for making the coating respectively.

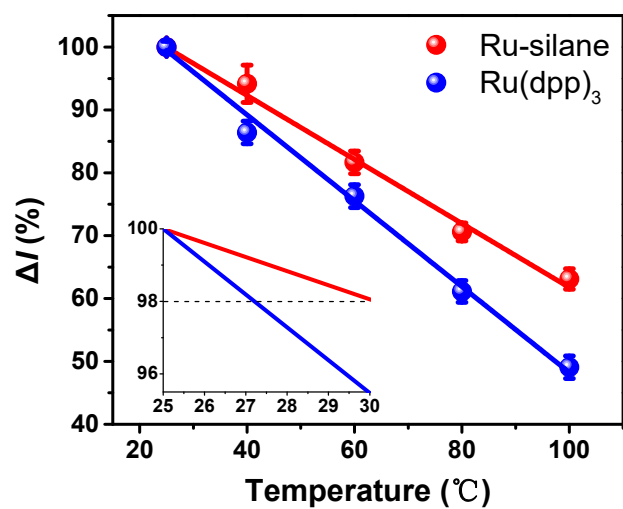

**Figure S4.** Temperature dependence of Ru-silane and Ru(dpp)<sub>3</sub> emission after being chemically grafted or physically entrapped onto the surface of bi-layer PSP coating.
